# Supplementary material
Source: PubMed Central journal article supplement (PMC2986068)

**Online supplementary information**

| <b>Table S1: Incidence rate of <i>SPAST</i> mutations in Hereditary spastic paraplegia (HSP)</b> |                        |                   |
|--------------------------------------------------------------------------------------------------|------------------------|-------------------|
|                                                                                                  | <b>Number of cases</b> | <b>Percentage</b> |
| <b>Pure HSP</b>                                                                                  | 32/109                 | 29.4%             |
| <b>Complex HSP</b>                                                                               | 5/23                   | 21.7%             |
| <b>Unknown HSP</b>                                                                               | 20/68                  | 29.4%             |
|                                                                                                  |                        |                   |
| <b>Familial HSP</b>                                                                              | 36/99                  | 36.4%             |
| <b>Sporadic HSP</b>                                                                              | 3/46                   | 6.5%              |
| <b>Unknown HSP</b>                                                                               | 18/55                  | 32.7%             |

**Table S2: The distribution of all the known mutations in spastin along its structural domains.**

| Domain/<br>Region                   | Missense        | Nonsense    | Splice<br>site | Insertions  | Deletions   | Small<br>indels | Total          | % of<br>mutations | % of<br>mutations in<br>three major<br>domains |
|-------------------------------------|-----------------|-------------|----------------|-------------|-------------|-----------------|----------------|-------------------|------------------------------------------------|
| <b>N-terminus<br/>(1-87 a.a)</b>    | 2               | --          | --             | 3           | --          | --              | <b>5</b>       | <b>2.1</b>        | --                                             |
| <b>TM<br/>(57-79 a.a)</b>           | --              | --          | --             | --          | --          | --              | <b>0</b>       | <b>0</b>          | --                                             |
| <b>MIT<br/>(116-197 a.a)</b>        | 2               | 5           | 2              | 3           | 5           | --              | <b>17</b>      | <b>7.2</b>        | <b>92.7</b>                                    |
| <b>N-terminus<br/>(228-269 a.a)</b> | 1               | 7           | 2              | 3           | 5           | --              | <b>18</b>      | <b>7.6</b>        |                                                |
| <b>MTBD<br/>(270-328 a.a)</b>       | --              | --          | 5              | 1           | 5           | 1               | <b>12</b>      | <b>5.1</b>        |                                                |
| <b>AAA<br/>(342-599 a.a)</b>        | 71 <sup>a</sup> | 11          | 38             | 13          | 37          | 1               | <b>171</b>     | <b>72.7</b>       |                                                |
| <b>C-terminus<br/>(600-616 a.a)</b> | 3               | 1           | --             | --          | --          | --              | <b>4</b>       | <b>1.7</b>        | --                                             |
| <b>N-terminus*<br/>(others)</b>     | 1               | 2           | 3              | 1           | 1           | --              | <b>8</b>       | <b>3.4</b>        | --                                             |
| <b>Total</b>                        | <b>80</b>       | <b>26</b>   | <b>50</b>      | <b>24</b>   | <b>53</b>   | <b>2</b>        | <b>235/235</b> | --                | --                                             |
| <b>% of<br/>mutations</b>           | <b>34.0</b>     | <b>11.0</b> | <b>21.2</b>    | <b>10.2</b> | <b>22.5</b> | <b>0.8</b>      | --             | --                | --                                             |

a.a, amino acids; Indels, insertion-deletion.

<sup>a</sup> Percentage of missense mutations in AAA (ATPases associated with diverse cellular activities) domain over the all missense mutations in spastin: 88.7 %

\* N-terminus (others) – excluding 1-87 a.a, TM (Transmembrane), MIT (Microtubule interacting and trafficking), N-terminus (228-269 a.a) and MTBD (Microtubule binding domain)

Note: Gross deletions are not included in this distribution analysis

| <b>Table S3: Classification of novel missense mutations in the AAA domain into different structural category</b> |                                                                                                                                                                                                                  |                                     |
|------------------------------------------------------------------------------------------------------------------|------------------------------------------------------------------------------------------------------------------------------------------------------------------------------------------------------------------|-------------------------------------|
| <b>Active Site Motif</b>                                                                                         | <b>Consensus sequence</b>                                                                                                                                                                                        | <b>Disease associated mutations</b> |
| Walker A                                                                                                         | <sup>382</sup> GPPGNGKTM <sup>390</sup>                                                                                                                                                                          | G385E                               |
| Walker B                                                                                                         | <sup>441</sup> DEV D <sup>444</sup>                                                                                                                                                                              | ---                                 |
| SRH                                                                                                              | <sup>480</sup> VLVMGATNRPQELDEAVLRR <sup>499</sup>                                                                                                                                                               | ---                                 |
| <b>Pore Loop Residues</b>                                                                                        |                                                                                                                                                                                                                  |                                     |
| Pore loop 1                                                                                                      | <sup>408</sup> AASLT SKYVGE G E K <sup>421</sup>                                                                                                                                                                 | G417E                               |
| Pore loop 2                                                                                                      | <sup>445</sup> SLLCERREGEHDAS <sup>458</sup>                                                                                                                                                                     | L447V                               |
| <b>Key Protomer Interacting Residues</b>                                                                         |                                                                                                                                                                                                                  |                                     |
|                                                                                                                  | E356, I357, I359, L360, L367, F368, R372, P384, G385, K388, T412, S413, K414, T415, D441, E442, R460, L466, N487, A495, R498, R499, K502, Q525, S547, D555, A557, L558, I561, R562, L564, R578, S595, T615, V616 | R460H, D555G<br>A557V               |
| <b>Other mutations</b>                                                                                           |                                                                                                                                                                                                                  | P361S, P374R<br>F427C, R514G        |

**Table S4: List of recurrent mutations showing clinical heterogeneity in the HSP patients.**

| Group Number | DNA Number | Exon            | cDNA                     | Protein            | Age at Onset | Familial | Symptoms                                                                |
|--------------|------------|-----------------|--------------------------|--------------------|--------------|----------|-------------------------------------------------------------------------|
| 1            | 25910      | Exon 1 + Exon12 | [c.131C>T] + [c.1417C>T] | [S44L] + [p.Q473X] | <10          | Yes      | Abnormal autonomic nervous system, increased sweating of hands and feet |
|              | 19598      | Exon 1 + Exon13 | [c.131C>T] + [c.1507C>T] | [S44L] + [p.R503W] | <60          | ?        |                                                                         |
| 2            | 21938      | Exon 9          | c.1196C>T                | p.S399L            | >10          | Yes      | Pure                                                                    |
|              | 24224      | Exon 9          | c.1196C>T                | p.S399L            | <60          | Yes      | ?                                                                       |
| 3            | 21214      | Exon 11         | c.1378C>T                | p.R460C            | <60          | Yes      | Pure                                                                    |
|              | 24222      | Exon 11         | c.1378C>T                | p.R460C            | <60          | Yes      | Polyneuropathy                                                          |
|              | 24228      | Exon 11         | c.1379G>A                | p.R460H            | <60          | Yes      | Pure                                                                    |
|              | 24285      | Exon 11         | c.1378C>T                | p.R460C            | <35          | Yes      | Pure                                                                    |
| 4            | 21929      | Exon 13         | c.1496G>A                | p.R499H            | <10          | Yes      | Trunk-ataxia                                                            |
|              | 25923      | Exon 13         | c.1495C>T                | p.R499C            | <10          | Yes      | Pure                                                                    |
| 5            | 21900      | Exon 14         | 1665A>G                  | p.R514G            | <60          | Yes      | ?                                                                       |
|              | 21985      | Exon 14         | 1665A>G                  | p.R514G            | ?            | ?        | ?                                                                       |
| 6            | 21920      | Exon 15         | c.1684C>T                | p.R562X            | ?            | ?        | ?                                                                       |
|              | 21976      | Exon 15         | c.1684C>T                | p.R562X            | ?            | ?        | ?                                                                       |
|              | 21974      | Exon 15         | c.1684C>T                | p.R562X            | <60          | Yes      | Pure                                                                    |
|              | 24201      | Exon 15         | c.1684C>T                | p.R562X            | <35          | Yes      | Pure                                                                    |
|              | 25912      | Exon 15         | c.1684C>T                | p.R562X            | <60          | Yes      | Pure                                                                    |
| 7            | 19597      | Exon17          | c.1821G>C                | p.W607C            | ?            | ?        | ?                                                                       |
|              | 25936      | Exon 17         | c.1821G>C                | p.W607C            | <35          | Yes      | Pure                                                                    |

**Legend for figure**

**Figure S1:** Structural categorization of novel missense mutations identified in our HSP cohort. The missense mutations identified were categorized into four classes based upon the model of the AAA domain of spastin. The first category consists of the active site mutations (A-C), the consensus amino acid residues are highlighted in red in the tertiary structure of spastin (A), the position of the mutation indicated as a red ball and stick in the tertiary and quaternary structure of spastin (B-C). The conserved pore loop residues are marked as green in the spastin structure (D), the HSP mutated residues categorized as pore loop mutations are depicted as a green ball and stick in the spastin monomer and hexamer (E-F). The key interacting residues between protomers required for oligomerization are shown in blue color in the tertiary structure of spastin (G). Furthermore, the identified HSP mutations in this group are also shown in the spastin monomer and hexamer (H-I). The HSP mutations which could not be classified in one of the above groups were designated as other class of mutations. Labeling of these mutated residues in the modeled spastin structure revealed that they can further be grouped in three clusters which are labeled in magenta, orange and yellow (J-K).

Figure S1

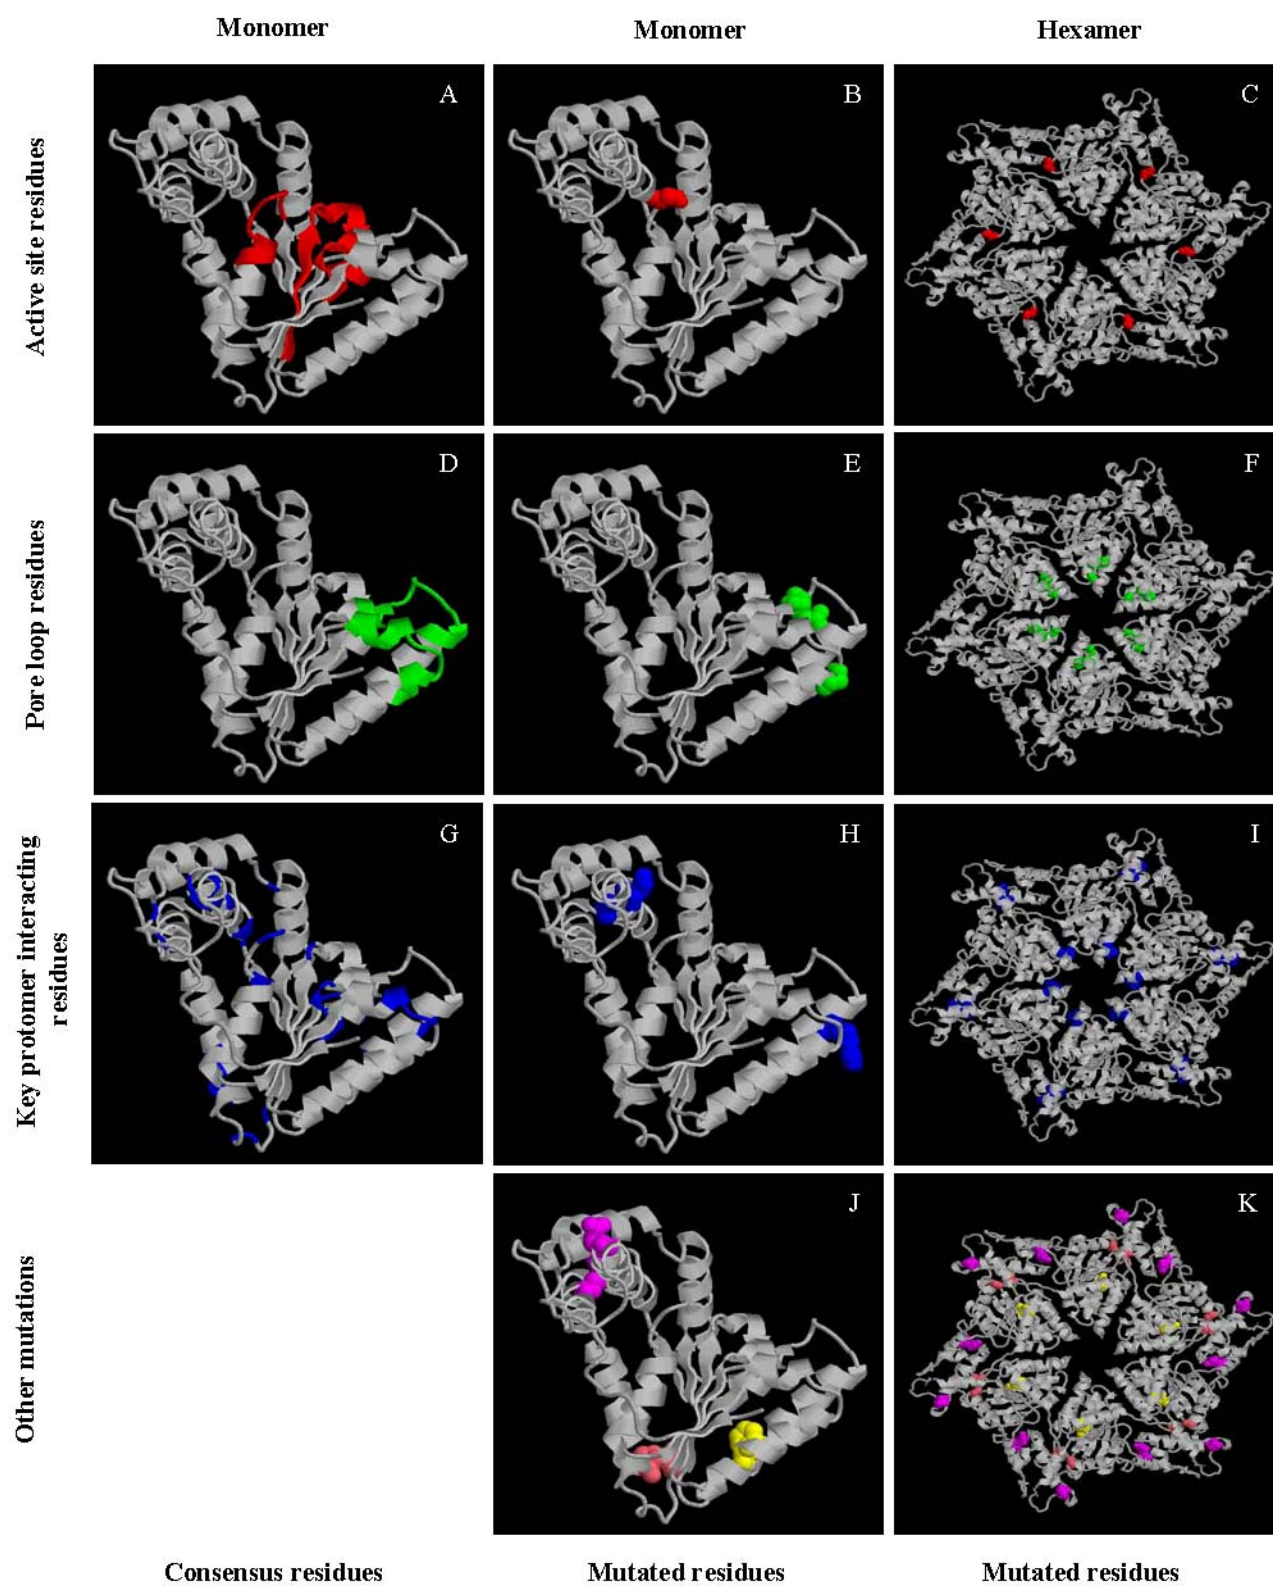

Supplement: ejhg2008147x1.pdf [file ejhg2008147x1.pdf]
